# Supplementary material
Source: PubMed Central journal article supplement (PMC7673367)
Supplement: 41587_2020_503_MOESM1_ESM.pdf [file 41587_2020_503_MOESM1_ESM.pdf]

In the format provided by the authors and unedited.

# Nanopore sequencing and the Shasta toolkit enable efficient de novo assembly of eleven human genomes

Kishwar Shafin <sup>1,11</sup>, Trevor Pesout<sup>1,11</sup>, Ryan Lorig-Roach<sup>1,11</sup>, Marina Haukness<sup>1,11</sup>, Hugh E. Olsen<sup>1,11</sup>, Colleen Bosworth<sup>1</sup>, Joel Armstrong<sup>1</sup>, Kristof Tigyi<sup>1,2</sup>, Nicholas Maurer <sup>1</sup>, Sergey Koren <sup>3</sup>, Fritz J. Sedlazeck <sup>4</sup>, Tobias Marschall <sup>5</sup>, Simon Mayes<sup>6</sup>, Vania Costa<sup>6</sup>, Justin M. Zook<sup>7</sup>, Kelvin J. Liu <sup>8</sup>, Duncan Kilburn<sup>8</sup>, Melanie Sorensen<sup>9</sup>, Katy M. Munson <sup>9</sup>, Mitchell R. Vollger <sup>9</sup>, Jean Monlong<sup>1</sup>, Erik Garrison<sup>1</sup>, Evan E. Eichler<sup>2,9</sup>, Sofie Salama<sup>1,2</sup>, David Haussler<sup>1,2</sup>, Richard E. Green<sup>1</sup>, Mark Akeson <sup>1</sup>, Adam Phillippy <sup>3</sup>, Karen H. Miga<sup>1</sup>, Paolo Carnevali<sup>10</sup> , Miten Jain <sup>1</sup>  and Benedict Paten <sup>1</sup> 

---

<sup>1</sup>UC Santa Cruz Genomics Institute, Santa Cruz, CA, USA. <sup>2</sup>Howard Hughes Medical Institute, University of California, Santa Cruz, CA, USA. <sup>3</sup>Genome Informatics Section, Computational and Statistical Genomics Branch, National Human Genome Research Institute, Bethesda, MD, USA. <sup>4</sup>Baylor College of Medicine, Human Genome Sequencing Center, Houston, TX, USA. <sup>5</sup>Max Planck Institute for Informatics, Saarbrücken, Germany. <sup>6</sup>Oxford Nanopore Technologies, Oxford, UK. <sup>7</sup>National Institute of Standards and Technology, Gaithersburg, MD, USA. <sup>8</sup>Circulomics Inc., Baltimore, MD, USA. <sup>9</sup>Department of Genome Sciences, University of Washington School of Medicine, Seattle, WA, USA. <sup>10</sup>Chan Zuckerberg Initiative, Redwood City, CA, USA. <sup>11</sup>These authors contributed equally: Kishwar Shafin, Trevor Pesout, Ryan Lorig-Roach, Marina Haukness, Hugh E. Olsen. e-mail: [paolo@chanzuckerberg.com](mailto:paolo@chanzuckerberg.com); [miten@soe.ucsc.edu](mailto:miten@soe.ucsc.edu); [bpaten@ucsc.edu](mailto:bpaten@ucsc.edu)

---

# SUPPLEMENTARY RESULTS: NANOPORE SEQUENCING AND THE SHASTA TOOLKIT ENABLE EFFICIENT *de novo* ASSEMBLY OF ELEVEN HUMAN GENOMES

---

## Supplementary Notes

### Execution Parameters

#### Shasta

All Shasta runs used Shasta version 0.1.0 built from <https://github.com/chanzuckerberg/shasta>. Rather than using the distributed version of the release, the source code was rebuilt locally for best performance as recommended by Shasta documentation.

The Shasta executable was run with the following command:

```
shasta \  
  --memoryMode filesystem \  
  --memoryBacking 2M
```

#### Canu

Canu 1.8 from <https://github.com/marbl/canu> was run with the following command:

```
canu \  
  -p asm \  
  -d asm \  
  genomeSize=3.1g \  
  'corMhapOptions=--threshold 0.8 --num-hashes 512  
    --ordered-sketch-size 1000 --ordered-kmer-size 14' \  
  'gridOptionsJobName=mom' \  
  'gridOptions=--time=240:00:00 --partition=norm' \  
  'stageDirectory=/lscratch/$SLURM_JOBID' \  
  'gridEngineStageOption=--gres=lscratch:100' \  
  'correctedErrorRate=0.105' \  
  -nanopore-raw input.fastq.gz
```

#### Wtdbg2

Wtdbg2 version 2.3 from <https://github.com/ruanjue/wtdbg2> was run with the following commands:

```
wtdbg2 \  
  -t 0 \  
  -x ont \  
  -L 10000 \  
  -g 3.3g \  
  -i reads1.fastq.gz \  
  -i reads2.fastq.gz
```

```
-i reads3.fastq.gz \
-o wtdbg2-assembly
```

```
wtpoa-cns \
-t 31 \
-i wtdbg2-assembly.ctg.lay.gz \
-f \
-o wtdbg2-assembly.fa
```

## Flye

Flye version 2.4.2 from <https://github.com/fenderglass/Flye> was run with the following command:

```
flye \
--nano-raw reads1.10kb.fastq.gz reads2.10kb.fastq.gz reads3.10kb.fastq.gz \
--genome-size 3.3g \
--out-dir flye \
--threads 123
```

## Racon

We used a home-grown script to manage running 4 iterations of Racon, v1.3.2. The code for the script can be found here [https://github.com/florigro/nanopore\\_assembly\\_and\\_polishing\\_assessment](https://github.com/florigro/nanopore_assembly_and_polishing_assessment), and was run with the following command:

```
python3 /home/ubuntu/software/nanopore_assembly_and_polishing_assessment/polish.py \
--true_ref hg38.fa \
--contigs assembly.fasta \
--sequences reads.fasta \
--output_dir racon \
--n_passes 4
```

When run for the analysis to produce Supplemental Table 26, the `n_passes` parameter was set to 1.

## Medaka

Medaka version 0.6.0-alpha.3 from <https://github.com/nanoporetech/medaka> was run with the following commands:

```
medaka consensus \
-i reads5.fasta \
-d assembly_racon4x.fasta \
-o medaka \
-t 64 \
-m r941_flip235
```

```
medaka stitch \
medaka/consensus_probs.hdf \
medaka/consensus.fasta
```

No changes in the arguments were used for the analysis that produced Supplemental Table 26. This includes the GPU mode, which is configured during compilation.

## Minialign

Minialign is bundled with Medaka, and was run with the following commands:

```
mini_align \
-i reads.fasta \
-r assembly.fasta \
-P \
-m \
-p medaka/calls_to_draft \
```

```
-t 60
```

### Minimap2, Samtools

Minimap2 version 2.15-r908-dirty from <https://github.com/lh3/minimap2>. We used samtools 1.7 using htlib 1.7-2 for sorting and filtering. The following three commands were piped into each other:

```
minimap2 \
  -ax map-ont \
  -t 70 \
  assembly.fasta \
  reads.fasta

samtools sort \
  -@ 70

samtools view \
  -hb \
  -F 0x104 \
  >align.bam
```

### MarginPolish

MarginPolish 1.0.0 was compiled from <https://github.com/UCSC-nanopore-cgl/MarginPolish> run with the following command:

```
marginPolish \
  input.bam \
  input.fa \
  allParams.np.human.guppy-ff-235.json \
  -f \
  -o output\_location \
  -t 70
```

When run to produce Supplemental Table 26, MarginPolish was used compiled from the commit 4c1da1e1b3efc739e9c48913416efac619d3d40c on GitHub.

### HELEN

HELEN version 0.1 from <https://github.com/kishwarshafin/helen> was run with the following commands:

```
python3 /home/ubuntu/software/helen/call_consensus.py \
  -i images/ \
  -b 1024 \
  -w 16 \
  -t 32 \
  -m r941_flip235_v001.pkl \
  -o out \
  -g

python3 /home/ubuntu/software/helen/stitch.py \
  -i out/helen_predictions_05312019_183902.hdf \
  -o out/ \
  -p polished_assembly \
  -t 32
```

### HiRise

HiRise was run via a docker container, with access given by Dovetail Genomics. The HiRise version was v2.1.6, with the HiRise Helper version 2.1.10 and the HiRise Utils version v2.1.7-3-g98c1a1b. Default parameters were used.

## Long Ranger

The 10X Long Ranger Align pipeline (v2.2) was used for any alignment of 10X reads to a reference. An example sequence of commands was:

```
longranger mkref assembly.fa

longranger align \
  --id 10x-chm13-chrX-round1 \
  --reference refdata-assembly \
  --fastqs fastq/
```

## Pilon

An example Pilon command (using v1.23) is below:

```
java -Xmx200G -jar pilon-1.23.jar \
  --bam align.bam \
  --genome assembly.fa \
  --threads 32 \
  --output pilon-out
```

## Trio-binning

For HG00733, the parental read sample accessions were obtained from 1000 genome database:

```
http://www.internationalgenome.org/data-portal/sample/HG00731
http://www.internationalgenome.org/data-portal/sample/HG00732
```

Briefly, k-mers were counted with `meryl`, subtracted to generate maternal/paternal sets, and any k-mers occurring less than 6 times for maternal k-mers and 5 times for paternal k-mers were not used. Binning did not use normalization by k-mer set size. This resulted in 35.2x maternal, 37.3x paternal, and 5.6x unclassified. Assembly did not use the unclassified reads and ran with the command:

```
canu \
  -p asm \
  -d <mom/dad>
  'genomeSize=3.1g' \
  'corMhapOptions=--threshold 0.8 --num-hashes 512
    --ordered-sketch-size 1000 --ordered-kmer-size 14' \
  'corMinCoverage=0'
```

Each haplotype assembly required approximately 100k CPU hours (4-5 days). A subsequent run using Canu 1.8 and automated binning with the command:

```
canu \
  -p asm \
  -d asm \
  'genomeSize=3.1g' \
  'corMhapOptions=--threshold 0.8 --num-hashes 512
    --ordered-sketch-size 1000 --ordered-kmer-size 14' \
  'gridOptionsJobName=733_trio' \
  'corMinCoverage=0' \
  -haplotypeMOM hg0732/*fastq.gz \
  -haplotypeDAD hg0731/*.fastq.gz
```

resulted in a similar classification split (35.1x dad, 36.7x mom, 5.6x unknown) and assembly (manual: dad=16.6 NG50, mom=18.1 NG50; automated: dad=14.1 NG50, mom=19.9 NG50).

For HG0002, illumina data for the parents was downloaded from the GIAB ftp site:

```
ftp://ftp-trace.ncbi.nlm.nih.gov/giab/ftp/data/AshkenazimTrio/HG003_NA24149_father \
  /NIST_HiSeq_HG003_Homogeneity-12389378/HG003_HiSeq300x_fastq/
ftp://ftp-trace.ncbi.nlm.nih.gov/giab/ftp/data/AshkenazimTrio/HG004_NA24143_mother \
  /NIST_HiSeq_HG004_Homogeneity-14572558/HG004_HiSeq300x_fastq/
```

K-mers were counted as before, subtracted, and filtered to exclude k-mers occurring less than 25 times in the maternal or paternal set. The classification resulted in 24x maternal, 23x paternal, and 3.5x unknown. Only classified reads were used for assembly with the command:

```
canu \
  -p asm \
  -d <mom/dad> \
  'genomeSize=3.1g' \
  'corMhapOptions=--threshold 0.8 --num-hashes 512
    --ordered-sketch-size 1000 --ordered-kmer-size 14' \
  'corMinCoverage=0'
```

Each haplotype assembly required approximately 100k cpu hours (4-5 days).

## QUAST

When using QUAST to evaluate assembly statistics and run BUSCO, we used the following command below. `--large` indicates that the genome is large, `--fragmented` indicates the reference genome may be fragmented, `--min-identity 80` indicates that alignments with identity less than 80% will be filtered, `--conserved-genes-finding` indicates that BUSCO will be run to find universal single-copy orthologs, and `eukaryote` indicates that the genome is from a eukaryote.

```
quast-lg.py \
  --threads 12 \
  -r truth_assembly.fa \
  -o quast-out \
  --large \
  --min-identity 80 \
  --fragmented \
  --conserved-genes-finding \
  --eukaryote \
  assembly.fa
```

## Benchmarking assemblies using Pomoxis

The truth assembly files and the reported error-rates are described in Online methods.

To benchmark the assemblies, we used `assess_assembly` pull 37 from Pomoxis (<https://github.com/nanoporetech/pomoxis/pull/37>). This tool is developed and suggested by the research group of Oxford Nanopore Technology. We added the functionality to ignore large insertions and deletions. The installation instruction of Pomoxis can be found on the github page <https://github.com/nanoporetech/pomoxis>. The parameters we used are:

- -i: The input assembly (fasta).
- -r: The reference fasta file. (The truth assembly)
- -b: Bed file containing reference regions to assess.
- -p: Prefix of the output file names.
- -c: Chunk size. Input reads/contigs will be broken into chunks prior to alignment.
- -t: Number of threads to use.
- -T: Trim consensus to primary alignments of truth to assembly.
- -l: Ignore insertions and deletions longer than this value, 0 means include everything. (default 0)

We compared the HG002 samples, we gathered the truth assembly `hg002_truth_assembly.fa`, a bed file `hg002_confident.bed` describing the confident regions and a shasta assembly `hg002_shasta_assembly.fa` and ran the following command.

```
assess_assembly \
  -i hg002_shasta_assembly.fa \
  -r hg002_truth_assembly.fa \
```

```

-b hg002_confident.bed \
-p hg002_shasta_assessment \
-c 1000 \
-l 50 \
-t 32 \
-T

```

In this setup, the `assess_assembly` module computes the error rate of the input `hg002_shasta_assembly.fa` that aligns to the high-confidence region defined in the `hg002_confident.bed` of `hg002_truth_assembly.fa` assembly. Also, the `-T` parameter limits the assessment to regions where there is an alignment between the truth and the input assembly.

For HG00733 sample, we used the high-quality phased PacBio assembly. We got `hg00733_truth_assembly.fa` and the `hg00733_shasta_assembly.fa` and ran the following command for assessment.

```

assess_assembly \
-i hg00733_shasta_assembly.fa \
-r hg00733_truth_assembly.fa \
-p hg00733_shasta_assessment \
-t 32 \
-c 1000 \
-l 50 \
-T

```

As the truth assembly of HG00733 does not define any high-confidence region, we do a whole genome comparison where there is an alignment between the truth and the input assembly enforced by the `-T` parameter. For CHM13 and all other assemblies, we used the same command as HG00733. The output of this program reports different error rates described in the online methods section.

### Extracting common assembly regions

To create a bed file describing the regions where all the assemblers have an assembly, we used `mini_align` available <https://github.com/nanoporetech/pomoxis/>, and `bedtools` which can be found in <https://bedtools.readthedocs.io/en/latest/>.

We first align the assembly to the truth assembly using `mini_align`.

```

mini_align -P -m -c 100000 \
-r truth_assembly.fa \
-i assembler_assembly.fa \
-t 64 \
-p assembler_2_truth

```

Then we extract the regions where the assemblers have an assembly:

```
bedtools bamtobed -i assembler_2_truth.bam > assembler.bed
```

Finally we do an intersection of all the bed files that we get from each assemblers. For HG002, we also included the high confidence region bed file.

```
multiIntersectBed -i <list_of_bed> | awk '$4 == <number_of_beds>' > common_regions.bed
```

```
sort -k1,1 -k2,2n common_regions_between_assemblers_hg002.bed > common_regions.sort.bed
```

```
bedtools merge -i common_regions.sort.bed > common_regions_between_assemblers.bed
```

### Extracting chrX from assemblies

To analyze subsets of the CHM13 assemblies which correspond to regions in chrX, we used the following steps to extract contigs. Briefly, we align the assembly to GRCh38, identify any assembly contig which had a primary or supplementary alignment to chrX, and extract these segments.

```

minimap2 -ax asm20 -t 32 GRCh38.fa assembly.fa | samtools view -hb >unsorted.bam
samtools sort -@ 32 unsorted.bam | samtools view -hb >assembly.bam
samtools index -@ 32 assembly.bam

```

MARCH 12, 2020

```
samtools view -F 0x104 assembly.bam chrX | awk '{print $1}' | sort | uniq >segments.txt  
extract_fasta_segments.py -i assembly.fa -s segments.txt -o assembly.hg38_chrX.fa
```

The script `extract_fasta_segments.py` can be found at [https://github.com/tpesout/genomics\\_scripts](https://github.com/tpesout/genomics_scripts).



## Supplementary Results

### Nanopore sequencing eleven human genomes in nine days

Supplementary Table 1: Read N50s stratified by sample and flowcell (three for each sample) for 11 samples.

| Sample         | Flowcell No. | Flowcell N50 | Sample N50   |
|----------------|--------------|--------------|--------------|
| GM24143        | 1            | 48891        | 46757        |
|                | 2            | 47044        |              |
|                | 3            | 44335        |              |
| GM24149        | 1            | 46054        | 43306        |
|                | 2            | 44245        |              |
|                | 3            | 39618        |              |
| GM24385        | 1            | 50349        | 48705        |
|                | 2            | 49319        |              |
|                | 3            | 46448        |              |
| HG00733        | 1            | 29862        | 29584        |
|                | 2            | 30473        |              |
|                | 3            | 28417        |              |
| HG01109        | 1            | 48795        | 45894        |
|                | 2            | 44218        |              |
|                | 3            | 44670        |              |
| HG01243        | 1            | 45467        | 43567        |
|                | 2            | 44681        |              |
|                | 3            | 40554        |              |
| HG02055        | 1            | 44320        | 45457        |
|                | 2            | 47148        |              |
|                | 3            | 44902        |              |
| HG02080        | 1            | 38519        | 39319        |
|                | 2            | 40123        |              |
|                | 3            | 39315        |              |
| HG02723        | 1            | 50509        | 49723        |
|                | 2            | 47842        |              |
|                | 3            | 50817        |              |
| HG03098        | 1            | 41463        | 40629        |
|                | 2            | 42308        |              |
|                | 3            | 38115        |              |
| HG03492        | 1            | 32149        | 30168        |
|                | 2            | 30063        |              |
|                | 3            | 28292        |              |
| <b>Average</b> | -            | <b>41889</b> | <b>42101</b> |

Supplementary Table 2: Throughput stratified by sample and flowcell (three for each sample) in gigabases (Gb) for 11 samples.

| Sample         | Flowcell No. | Flowcell (Gb) | Sample (Gb) | Coverage     |
|----------------|--------------|---------------|-------------|--------------|
| GM24143        | 1            | 87            | 280         | 84.72        |
|                | 2            | 97            |             |              |
|                | 3            | 95            |             |              |
| GM24149        | 1            | 82            | 273         | 82.6         |
|                | 2            | 107           |             |              |
|                | 3            | 84            |             |              |
| GM24385        | 1            | 26            | 157         | 47.43        |
|                | 2            | 71            |             |              |
|                | 3            | 59            |             |              |
| HG00733        | 1            | 62            | 242         | 73.45        |
|                | 2            | 90            |             |              |
|                | 3            | 89            |             |              |
| HG01109        | 1            | 71            | 219         | 66.48        |
|                | 2            | 79            |             |              |
|                | 3            | 70            |             |              |
| HG01243        | 1            | 71            | 187         | 56.68        |
|                | 2            | 73            |             |              |
|                | 3            | 43            |             |              |
| HG02055        | 1            | 71            | 202         | 61.33        |
|                | 2            | 67            |             |              |
|                | 3            | 65            |             |              |
| HG02080        | 1            | 71            | 172         | 52.21        |
|                | 2            | 42            |             |              |
|                | 3            | 59            |             |              |
| HG02723        | 1            | 81            | 227         | 68.7         |
|                | 2            | 69            |             |              |
|                | 3            | 78            |             |              |
| HG03098        | 1            | 79            | 177         | 53.63        |
|                | 2            | 40            |             |              |
|                | 3            | 58            |             |              |
| HG03492        | 1            | 61            | 158         | 47.74        |
|                | 2            | 45            |             |              |
|                | 3            | 51            |             |              |
| <b>Average</b> | -            | <b>69</b>     | <b>208</b>  | <b>63.18</b> |

Supplementary Table 3: Mean, median, and modal values for read alignment identities of 11 samples, aligned to GRCh38. Metrics were generated per read. Total gigabases of read data for each sample are detailed in Supplementary Table 2

| Sample              | Mean           | Median         | Mode         |
|---------------------|----------------|----------------|--------------|
| GM24143             | 0.87188        | 0.89651        | 0.920        |
| GM24149             | 0.87665        | 0.90511        | 0.930        |
| GM24385             | 0.88276        | 0.91143        | 0.935        |
| HG00733             | 0.87165        | 0.89682        | 0.925        |
| HG01109             | 0.87033        | 0.89845        | 0.930        |
| HG01243             | 0.88525        | 0.91435        | 0.935        |
| HG02055             | 0.87215        | 0.90572        | 0.930        |
| HG02080             | 0.88188        | 0.91259        | 0.935        |
| HG02723             | 0.84914        | 0.87565        | 0.920        |
| HG03098             | 0.85522        | 0.88156        | 0.915        |
| <b>All samples:</b> | <b>0.87251</b> | <b>0.90068</b> | <b>0.930</b> |

Supplementary Table 4: Summary read statistics derived from human saliva sequencing.

| Reads   | Bases          | Mean Length | Median Length | Read N50 |
|---------|----------------|-------------|---------------|----------|
| 594,753 | 10,961,203,887 | 18,430      | 15,580        | 27,778   |

**Shasta: assembling a human genome from nanopore reads in under 6 hours**

Supplementary Table 5: QCAST assembly metrics of three samples on four assemblers before polishing, compared against GRCh38 with no alternate contigs.

| Sample                   | Metric                   | Shasta        | Wtdbg2        | Flye          | Canu          |
|--------------------------|--------------------------|---------------|---------------|---------------|---------------|
| HG00733                  | # contigs                | 2,150         | 5,086         | 1,852         | 778           |
|                          | Total length             | 2,783,599,890 | 2,792,376,827 | 2,816,034,584 | 2,900,719,051 |
|                          | N50                      | 24,429,871    | 18,763,119    | 28,763,002    | 44,759,083    |
|                          | NG50                     | 21,088,309    | 15,338,021    | 25,227,330    | 40,627,903    |
|                          | # disagreements          | 814           | 3,985         | 6,555         | 4,570         |
|                          | Genome fraction (%)      | 94.982        | 92.938        | 95.763        | 96.404        |
|                          | Duplication ratio        | 0.995         | 1.005         | 0.986         | 1.014         |
|                          | # mismatches per 100 kbp | 156.21        | 248.78        | 506.12        | 231.24        |
|                          | # indels per 100 kbp     | 453.97        | 664.90        | 1,480.91      | 677.26        |
|                          | Total aligned length     | 2,775,307,347 | 2,742,343,142 | 2,769,440,009 | 2,858,769,830 |
|                          | NA50                     | 16,052,981    | 9,106,500     | 18,577,806    | 21,157,324    |
|                          | NGA50                    | 12,765,264    | 7,787,949     | 16,267,214    | 19,945,150    |
|                          | HG002                    | # contigs     | 1,847         | 5,310         | 1,627         |
| Total length             |                          | 2,801,200,983 | 2,793,889,694 | 2,819,241,152 | 2,901,099,163 |
| N50                      |                          | 23,346,484    | 15,380,722    | 31,253,170    | 33,064,788    |
| NG50                     |                          | 20,205,529    | 13,750,884    | 25,917,293    | 32,340,595    |
| # disagreements          |                          | 901           | 3,572         | 5,881         | 3,882         |
| Genome fraction (%)      |                          | 95.622        | 93.136        | 96.228        | 96.959        |
| Duplication ratio        |                          | 0.995         | 1.004         | 0.981         | 1.009         |
| # mismatches per 100 kbp |                          | 167.75        | 261.72        | 549.10        | 231.39        |
| # indels per 100 kbp     |                          | 520.33        | 796.71        | 1,650.63      | 792.45        |
| Total aligned length     |                          | 2,792,458,737 | 2,743,401,414 | 2,768,347,339 | 2,863,787,213 |
| NA50                     |                          | 16,068,951    | 8,564,600     | 18,803,788    | 21,330,391    |
| NGA50                    |                          | 14,189,972    | 7,361,363     | 16,079,132    | 18,175,258    |
| CHM13                    |                          | # contigs     | 1,236         | 6,428         | 1,269         |
|                          | Total length             | 2,809,087,051 | 2,836,802,421 | 2,857,931,691 | 2,919,690,848 |
|                          | N50                      | 46,037,322    | 15,522,332    | 36,829,446    | 80,507,947    |
|                          | NG50                     | 41,091,906    | 14,039,241    | 35,319,460    | 79,504,166    |
|                          | # disagreements          | 1,051         | 4,202         | 5,452         | 4,768         |
|                          | Genome fraction (%)      | 95.307        | 93.124        | 96.022        | 96.553        |
|                          | Duplication ratio        | 1.000         | 1.017         | 0.997         | 1.014         |
|                          | # mismatches per 100 kbp | 155.15        | 256.17        | 443.85        | 226.04        |
|                          | # indels per 100 kbp     | 358.45        | 535.46        | 1,023.79      | 484.46        |
|                          | Total aligned length     | 2,798,043,587 | 2,780,449,715 | 2,807,157,420 | 2,864,418,837 |
|                          | NA50                     | 23,475,255    | 6,786,237     | 18,991,999    | 25,611,947    |
|                          | NGA50                    | 18,990,051    | 5,892,796     | 17,032,972    | 23,819,455    |

Supplementary Table 6: QUAST disagreement count for four assemblers on different regions of the genome for four samples. We report disagreements that happen in all chromosomes of GRCh38, then incrementally exclude centromeric regions, segmental duplication regions (Seg Dups), and all other regions enriched for SVs (chrY, acrocentric chromosome arms, and QH-regions)

| Sample  | Assembler | Disagreements in GRCh38 autosomes and chrX, chrY | Disagreements outside centromeres | Disagreements outside centromeres and seg dups | Disagreements outside centromeres, seg dups, chrY, acrocentric chr arms, and QH-regions |
|---------|-----------|--------------------------------------------------|-----------------------------------|------------------------------------------------|-----------------------------------------------------------------------------------------|
| HG002   | Shasta    | 901                                              | 755                               | 284                                            | 121                                                                                     |
|         | Flye      | 5881                                             | 1226                              | 513                                            | 117                                                                                     |
|         | Canu      | 3882                                             | 2347                              | 689                                            | 216                                                                                     |
|         | Wtdbg2    | 3572                                             | 1213                              | 484                                            | 148                                                                                     |
| HG00733 | Shasta    | 814                                              | 662                               | 256                                            | 110                                                                                     |
|         | Flye      | 6555                                             | 1261                              | 604                                            | 134                                                                                     |
|         | Canu      | 4570                                             | 2791                              | 755                                            | 224                                                                                     |
|         | Wtdbg2    | 3985                                             | 1166                              | 474                                            | 135                                                                                     |
| CHM13   | Shasta    | 1051                                             | 795                               | 333                                            | 129                                                                                     |
|         | Flye      | 5452                                             | 1228                              | 448                                            | 107                                                                                     |
|         | Canu      | 4768                                             | 2764                              | 864                                            | 164                                                                                     |
|         | Wtdbg2    | 4202                                             | 1519                              | 592                                            | 249                                                                                     |

Supplementary Table 7: Disagreement count in the intersection of the assemblies for each sample (see Online Methods). Total Disagreements describes all disagreements found in 100bp windows before taking the intersection; note that these counts are very close to those reported by QUAST. Consensus Disagreements describes disagreements in the intersection of the four assemblies. Genome fraction describes total coverage over GRCh38 for the consensus sequence.

| Sample  | Assembler | Total Disagreements | Consensus Disagreements | Genome Fraction |
|---------|-----------|---------------------|-------------------------|-----------------|
| HG002   | Shasta    | 863                 | 179                     | 87.16%          |
|         | Flye      | 5823                | 178                     | 87.16%          |
|         | Canu      | 3779                | 328                     | 87.16%          |
|         | Wtdbg2    | 3509                | 215                     | 87.16%          |
| HG00733 | Shasta    | 792                 | 161                     | 87.43%          |
|         | Flye      | 6546                | 178                     | 87.43%          |
|         | Canu      | 4524                | 383                     | 87.43%          |
|         | Wtdbg2    | 3975                | 205                     | 87.43%          |
| CHM13   | Shasta    | 1033                | 242                     | 87.53%          |
|         | Flye      | 5446                | 217                     | 87.53%          |
|         | Canu      | 4682                | 712                     | 87.53%          |
|         | Wtdbg2    | 4190                | 404                     | 87.53%          |

Supplementary Table 8: Disagreement count and fraction of genome covered on chromosome X for four assemblers on CHM13 assemblies with no polishing, compared to the chromosome X assembly from the Telomere-to-Telomere Consortium. These numbers were obtained via running QUASt.

| Assembler | Disagreements | Genome Fraction |
|-----------|---------------|-----------------|
| Shasta    | 5             | 97.73%          |
| Wtdbg2    | 87            | 94.17%          |
| Flye      | 18            | 98.41%          |
| Canu      | 9             | 98.16%          |

Supplementary Table 9: BAC analysis on selected dataset. BACs were selected (31 of CHM13 and 16 of HG00733) for falling within unique regions of the genome, specifically >10 Kb away from the closest segmental duplication. *Closed* refers to the number of BACs for which 99.5% of their length aligns to a single locus in the assembly. *Attempted* refers to the number of BACs which have an alignment for >5 Kb of sequence with >90% identity to only one contig (BACs which have such alignments to multiple contigs are excluded). Identity metrics are for *closed* BACs.

| Sample  | Assembler | BAC counts |           |        |                       | Median Quality |       | Mean Quality |       |
|---------|-----------|------------|-----------|--------|-----------------------|----------------|-------|--------------|-------|
|         |           | Total      | Attempted | Closed | Closed of attempted % | Identity %     | QV    | Identity %   | QV    |
| CHM13   | Canu      | 31         | 31        | 30     | 96.77                 | 99.40          | 22.18 | 99.34        | 21.84 |
|         | Flye      | 31         | 31        | 31     | 100.00                | 97.58          | 16.17 | 97.65        | 16.28 |
|         | Shasta    | 31         | 31        | 31     | 100.00                | 99.55          | 23.51 | 99.51        | 23.07 |
|         | Wtdbg2    | 31         | 29        | 28     | 96.55                 | 99.46          | 22.71 | 99.39        | 22.15 |
| HG00733 | Canu      | 16         | 16        | 15     | 93.75                 | 98.74          | 18.98 | 98.61        | 18.56 |
|         | Flye      | 16         | 16        | 16     | 100                   | 97.99          | 16.97 | 98.01        | 17.02 |
|         | Shasta    | 16         | 16        | 16     | 100                   | 98.84          | 19.38 | 98.79        | 19.20 |
|         | Wtdbg2    | 16         | 16        | 16     | 100                   | 98.81          | 19.26 | 98.79        | 19.20 |

Supplementary Table 10: BAC analysis on full dataset, 341 on CHM13 and 179 on HG00733. *Closed* refers to the number of BACs for which 99.5% of their length aligns to a single locus. *Attempted* refers to the number of BACs which have an alignment for >5Kb of sequence with >90% identity to only one contig (BACs which have such alignments to multiple contigs are excluded). Identity metrics are for *closed* BACs.

| Sample  | Assembler Polisher | BAC counts |           |        |                       | Median Quality |       | Mean Quality |       |
|---------|--------------------|------------|-----------|--------|-----------------------|----------------|-------|--------------|-------|
|         |                    | Total      | Attempted | Closed | Closed of attempted % | Identity %     | QV    | Identity %   | QV    |
| CHM13   | Canu               | 341        | 309       | 287    | 92.88                 | 99.22          | 21.07 | 98.93        | 19.7  |
|         | Flye               | 341        | 227       | 202    | 88.98                 | 97.54          | 16.09 | 97.51        | 16.03 |
|         | Shasta             | 341        | 94        | 92     | 97.87                 | 99.47          | 22.74 | 99.37        | 21.99 |
|         | Wtdbg2             | 341        | 70        | 62     | 88.57                 | 99.36          | 21.96 | 99.28        | 21.43 |
| HG00733 | Canu               | 179        | 137       | 124    | 90.51                 | 98.73          | 18.95 | 98.43        | 18.05 |
|         | Flye               | 179        | 98        | 80     | 81.63                 | 98.09          | 17.18 | 97.76        | 16.49 |
|         | Shasta             | 179        | 42        | 40     | 95.23                 | 98.76          | 19.08 | 98.13        | 17.30 |
|         | Wtdbg2             | 179        | 52        | 46     | 88.46                 | 98.70          | 18.87 | 98.02        | 17.04 |

Supplementary Table 11: BAC analysis intersection of attempted BACs by all four assemblers, 65 on CHM13 and 27 on HG00733. *Closed* refers to the number of BACs for which 99.5% of their length aligns to a single locus. *Attempted* refers to the number of BACs which have an alignment for >5Kb of sequence with >90% identity to only one contig (BACs which have such alignments to multiple contigs are excluded). Identity metrics are for *closed* BACs.

| Sample  | Assembler Polisher | BAC counts |           |        |                       | Median Quality |       | Mean Quality |       |
|---------|--------------------|------------|-----------|--------|-----------------------|----------------|-------|--------------|-------|
|         |                    | Total      | Attempted | Closed | Closed of attempted % | Identity %     | QV    | Identity %   | QV    |
| CHM13   | Canu               | 65         | 65        | 64     | 98.50                 | 99.29          | 21.53 | 99.21        | 21.01 |
|         | Flye               | 65         | 65        | 65     | 100.00                | 97.57          | 16.16 | 97.61        | 16.22 |
|         | Shasta             | 65         | 65        | 65     | 100.00                | 99.50          | 23.03 | 99.41        | 22.33 |
|         | Wtdbg2             | 65         | 65        | 59     | 90.80                 | 99.39          | 22.17 | 99.29        | 21.49 |
| HG00733 | Canu               | 27         | 27        | 26     | 96.30                 | 98.66          | 18.76 | 98.54        | 18.37 |
|         | Flye               | 27         | 27        | 27     | 100.00                | 98.07          | 17.14 | 98.08        | 17.16 |
|         | Shasta             | 27         | 27        | 27     | 100.00                | 98.80          | 19.23 | 98.30        | 17.71 |
|         | Wtdbg2             | 27         | 27        | 26     | 96.30                 | 98.75          | 19.01 | 98.53        | 18.32 |

Supplementary Table 12: Base-level accuracies on four different assemblers for three samples. Analysis is performed with whole-genome truth sequences.

| Sample                 | Assembler | Percentage Errors |          |          |           |
|------------------------|-----------|-------------------|----------|----------|-----------|
|                        |           | Balanced          | Identity | Deletion | Insertion |
| HG002<br>Guppy 2.3.5   | Shasta    | 0.975%            | 0.061%   | 0.849%   | 0.065%    |
|                        | Wtdbg2    | 1.181%            | 0.080%   | 1.073%   | 0.029%    |
|                        | Canu      | 1.400%            | 0.065%   | 1.316%   | 0.020%    |
|                        | Flye      | 1.636%            | 0.068%   | 0.450%   | 1.118%    |
| HG00733<br>Guppy 2.3.5 | Shasta    | 1.062%            | 0.083%   | 0.887%   | 0.093%    |
|                        | Wtdbg2    | 1.217%            | 0.108%   | 1.059%   | 0.051%    |
|                        | Canu      | 1.328%            | 0.074%   | 1.224%   | 0.031%    |
|                        | Flye      | 1.854%            | 0.089%   | 0.445%   | 1.320%    |
| CHM13<br>Guppy 2.3.1   | Shasta    | 0.540%            | 0.039%   | 0.430%   | 0.072%    |
|                        | Wtdbg2    | 0.689%            | 0.068%   | 0.583%   | 0.038%    |
|                        | Canu      | 0.705%            | 0.038%   | 0.643%   | 0.024%    |
|                        | Flye      | 2.213%            | 0.051%   | 0.448%   | 1.715%    |

Supplementary Table 13: Base-level accuracies on four different assemblers for three samples in the regions of intersection of the assemblies. Analysis is performed only on regions where all assemblers have an assembled sequence.

| Sample                 | Assembler | Percentage Errors |          |          |           |
|------------------------|-----------|-------------------|----------|----------|-----------|
|                        |           | Balanced          | Identity | Deletion | Insertion |
| HG002<br>Guppy 2.3.5   | Shasta    | 0.943%            | 0.056%   | 0.823%   | 0.064%    |
|                        | Wtdbg2    | 1.145%            | 0.077%   | 1.041%   | 0.028%    |
|                        | Canu      | 1.319%            | 0.050%   | 1.253%   | 0.016%    |
|                        | Flye      | 1.554%            | 0.063%   | 0.432%   | 1.059%    |
| HG00733<br>Guppy 2.3.5 | Shasta    | 1.021%            | 0.064%   | 0.875%   | 0.083%    |
|                        | Wtdbg2    | 1.162%            | 0.088%   | 1.034%   | 0.041%    |
|                        | Canu      | 1.307%            | 0.065%   | 1.213%   | 0.030%    |
|                        | Flye      | 1.847%            | 0.068%   | 0.431%   | 1.348%    |
| CHM13<br>Guppy 2.3.1   | Shasta    | 0.513%            | 0.016%   | 0.406%   | 0.048%    |
|                        | Wtdbg2    | 0.660%            | 0.054%   | 0.575%   | 0.030%    |
|                        | Canu      | 0.692%            | 0.027%   | 0.645%   | 0.021%    |
|                        | Flye      | 2.198%            | 0.036%   | 0.460%   | 1.702%    |



Supplementary Table 14: Runtime and cost of three assembly workflows on Amazon Web Services (AWS) platform.

| Method                | Sample  | Minutes | Threads Used | Peak Memory | AWS Instance Type | AWS Instance Cost |
|-----------------------|---------|---------|--------------|-------------|-------------------|-------------------|
| WTDBG2                | HG00733 | 2971    | 63           | 365         | r5a.16xlarge      | \$3.62            |
|                       | GM24385 | 1752    | 63           | 293         | r5a.16xlarge      | \$3.62            |
|                       | CHM13   | 1655    | 63           | 312         | r5a.16xlarge      | \$3.62            |
| WTDBG2<br>(wtpoa-cns) | HG00733 | 248     | 31           | 12          | r5a.16xlarge      | \$3.62            |
|                       | GM24385 | 274     | 24           | 12          | r5a.16xlarge      | \$3.62            |
|                       | CHM13   | 257     | 31           | 12          | r5a.16xlarge      | \$3.62            |
| Flye                  | HG00733 | 3421    | 123          | 1013        | x1.32xlarge       | \$13.34           |
|                       | GM24385 | 3749    | 64           | 727         | x1.16xlarge       | \$6.67            |
|                       | CHM13   | 4084    | 126          | 911         | x1.32xlarge       | \$13.34           |
| Shasta                | HG00733 | 298     | 128          | 966         | x1.32xlarge       | \$13.34           |
|                       | HG01109 | 355     | 128          | -           | x1.32xlarge       | \$13.34           |
|                       | HG01243 | 296     | 128          | -           | x1.32xlarge       | \$13.34           |
|                       | HG02055 | 309     | 128          | -           | x1.32xlarge       | \$13.34           |
|                       | HG02080 | 276     | 128          | -           | x1.32xlarge       | \$13.34           |
|                       | HG02723 | 373     | 128          | -           | x1.32xlarge       | \$13.34           |
|                       | HG03098 | 238     | 128          | -           | x1.32xlarge       | \$13.34           |
|                       | HG03492 | 200     | 128          | -           | x1.32xlarge       | \$13.34           |
|                       | GM24385 | 240     | 128          | 692         | x1.32xlarge       | \$13.34           |
|                       | GM24149 | 427     | 128          | -           | x1.32xlarge       | \$13.34           |
|                       | GM24143 | 451     | 128          | -           | x1.32xlarge       | \$13.34           |
|                       | CHM13   | 317     | 128          | -           | x1.32xlarge       | \$13.34           |

Supplementary Table 15: Runtime breakdown for each step of the Shasta assembler.

| Sample           | Input | MinHash | Alignments | Marker graph creation | Transitive reduction | Assemble | Output | Other | Total |
|------------------|-------|---------|------------|-----------------------|----------------------|----------|--------|-------|-------|
| HG00733          | 30    | 9       | 93         | 73                    | 17                   | 15       | 2      | 55    | 298   |
| HG01109          | 29    | 10      | 136        | 89                    | 16                   | 17       | 2      | 53    | 355   |
| HG01243          | 23    | 7       | 104        | 73                    | 16                   | 15       | 2      | 51    | 296   |
| HG02055          | 25    | 9       | 113        | 73                    | 15                   | 15       | 2      | 53    | 309   |
| HG02080          | 22    | 7       | 95         | 67                    | 15                   | 14       | 2      | 49    | 276   |
| HG02723          | 29    | 9       | 146        | 89                    | 19                   | 16       | 2      | 59    | 373   |
| HG03098          | 23    | 8       | 73         | 53                    | 14                   | 14       | 2      | 47    | 238   |
| HG03492          | 19    | 7       | 57         | 44                    | 11                   | 14       | 2      | 40    | 200   |
| GM24385          | 20    | 7       | 92         | 49                    | 12                   | 13       | 2      | 41    | 240   |
| GM24149          | 34    | 11      | 149        | 124                   | 21                   | 18       | 2      | 64    | 427   |
| GM24143          | 35    | 11      | 168        | 120                   | 24                   | 18       | 2      | 69    | 451   |
| CHM13            | 21    | 6       | 173        | 67                    | 12                   | 13       | 2      | 46    | 345   |
| Average          | 26    | 8       | 117        | 77                    | 16                   | 15       | 2      | 52    | 317   |
| Percent of total | 8%    | 3%      | 37%        | 24%                   | 5%                   | 5%       | 1%     | 17%   | 100%  |

Supplementary Table 16: Structural variants extracted from HG002 assembly graph compared to GIAB SV set in high-confidence regions.

| Metric  | HG002 |      |      |           |        |        |
|---------|-------|------|------|-----------|--------|--------|
|         | TP    | FP   | FN   | Precision | Recall | $F_1$  |
| Total   | 2961  | 1580 | 1202 | 0.6521    | 0.7117 | 0.6806 |
| Inserts | 2152  | 1203 | 810  | 0.6414    | 0.7117 | 0.7289 |
| Deletes | 809   | 377  | 392  | 0.6821    | 0.6681 | 0.6750 |

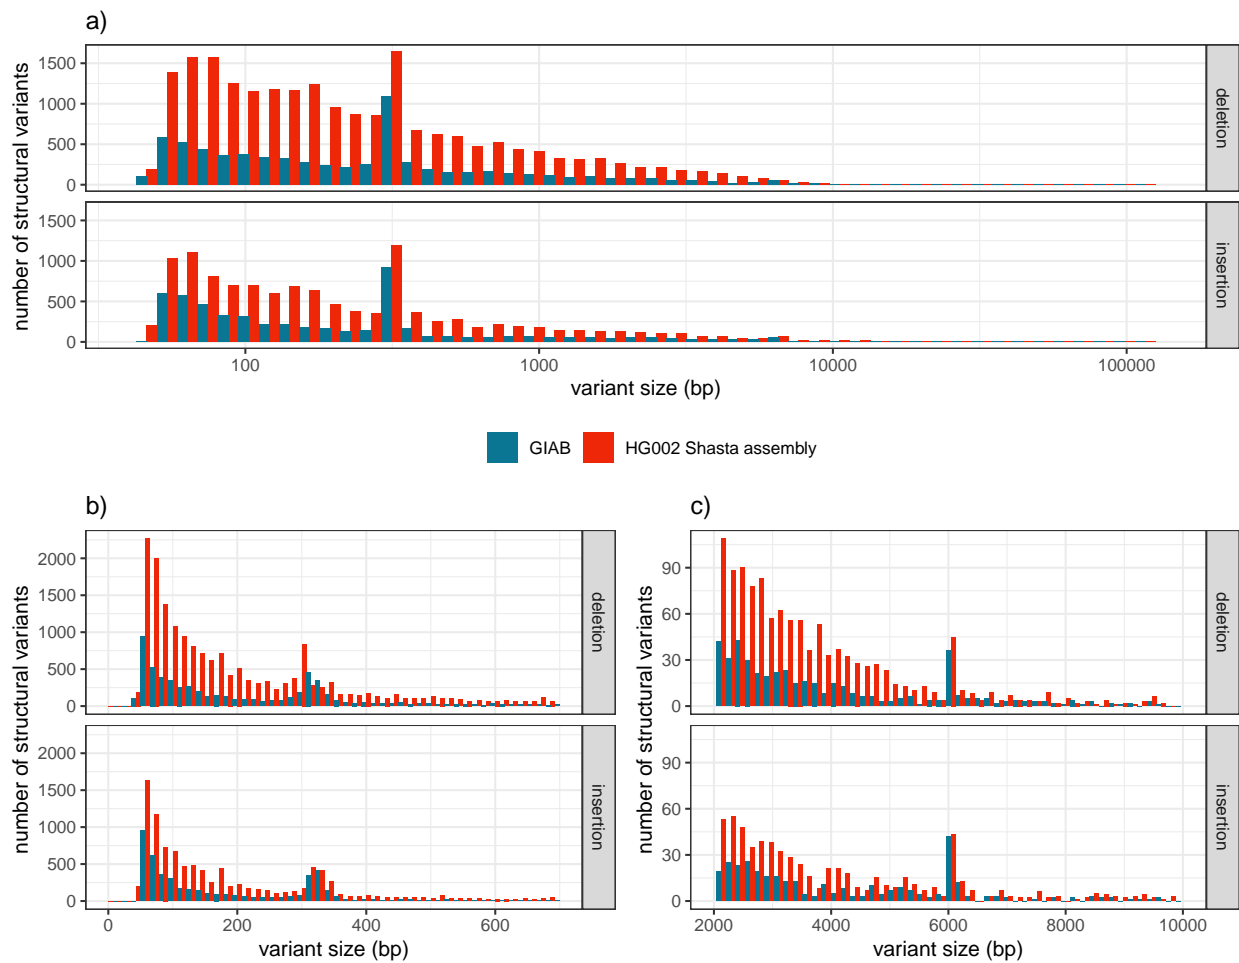

Supplementary Figure 1: Size distribution of structural variants (>50 bp) extracted from the Shasta assembly graph for HG002 and the structural variants in the Genome In A Bottle (GIAB) catalog for the same sample. a) Full size distribution for deletions (top) and insertion (bottom), in log-scale. b) and c) zoom in the two peaks caused by Alu ( 300 bp) and L1 ( 6 Kbp) insertion polymorphisms.

**Contiguously assembling MHC haplotypes**

Supplementary Table 17: CHM13 MHC unpolished Shasta assembly as compared to the nearest matching haplotype in hg38 (GL000251.2)

| Assembler | Best Contig | Disagreements | Largest Aligned | Mismatch Rate | Indel Rate |
|-----------|-------------|---------------|-----------------|---------------|------------|
| Shasta    | 62          | 6             | 2,788,362       | 0.00296       | 0.00399    |
| Canu      | tig00589784 | 5             | 2,792,139       | 0.00331       | 0.00607    |
| Flye      | contig_115  | 6             | 2,787,570       | 0.00543       | 0.01106    |
| wtdbg2    | ctg25       | 32            | 1,819,753       | 0.00553       | 0.00576    |

Supplementary Table 18: QUASt results for the HG00733 trio-binned maternal reads, using all four assemblers.

| Metric                   | HG00733-Mother |               |                |               |
|--------------------------|----------------|---------------|----------------|---------------|
|                          | Shasta         | Wtdbg2        | Flye (initial) | Canu          |
| # contigs                | 1,934          | 4,028         | 1,634          | 877           |
| Total length             | 2,754,225,214  | 2,690,619,717 | 2,791,893,188  | 2,829,920,708 |
| N50                      | 9,071,623      | 14,125,235    | 25,658,831     | 19,451,828    |
| NG50                     | 7,702,138      | 10,217,387    | 23,775,989     | 16,507,795    |
| # disagreements          | 705            | 3,661         | 6,082          | 2,161         |
| Genome fraction (%)      | 90.824         | 87.373        | 92.121         | 92.298        |
| Duplication ratio        | 0.993          | 0.996         | 0.982          | 0.999         |
| # mismatches per 100 kbp | 194.15         | 287.89        | 549.61         | 232.72        |
| # indels per 100 kbp     | 576.55         | 859.83        | 1585.30        | 724.67        |
| Total aligned length     | 2,748,135,723  | 2,650,821,801 | 2,751,532,754  | 2,798,797,021 |
| NA50                     | 7,805,090      | 7,615,651     | 15,615,208     | 11,947,316    |
| NGA50                    | 6,339,949      | 5,584,544     | 12,833,996     | 10,085,023    |

Supplementary Table 19: HG00733 Maternal trio binned MHC unpolished Shasta assembly as compared to the nearest matching haplotype in hg38 (GL000255.1)

| Assembler | Best Contig | Disagreements | Largest Aligned | Mismatch Rate | Indel Rate |
|-----------|-------------|---------------|-----------------|---------------|------------|
| Shasta    | 226         | 0             | 4,289,729       | 0.00206       | 0.00538    |
| Canu      | tig00002130 | 0             | 4,289,729       | 0.00182       | 0.00676    |
| Flye      | contig_295  | 0             | 4,289,729       | 0.00579       | 0.01759    |
| wtdbg2    | ctg36       | 23            | 1,418,939       | 0.00592       | 0.00905    |

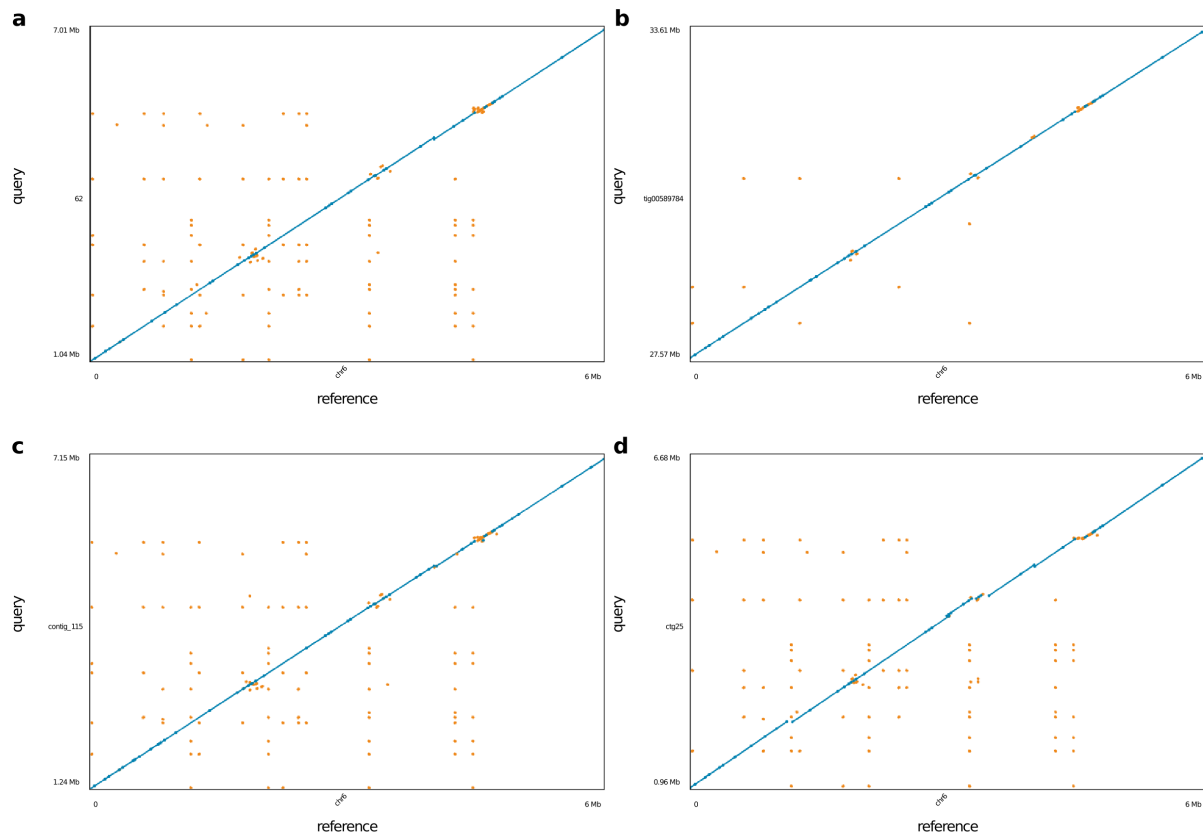

Supplementary Figure 2: Dotplot of unpolished CHM13 MHC assembly vs hg38 chr6:28000000-34000000 for the each of the 4 assemblers tested. **(a)** Shasta **(b)** Canu **(c)** Flye (no native polish) **(d)** wtdbg2. Blue dots represent unique alignments and orange dots represent repetitive alignments.

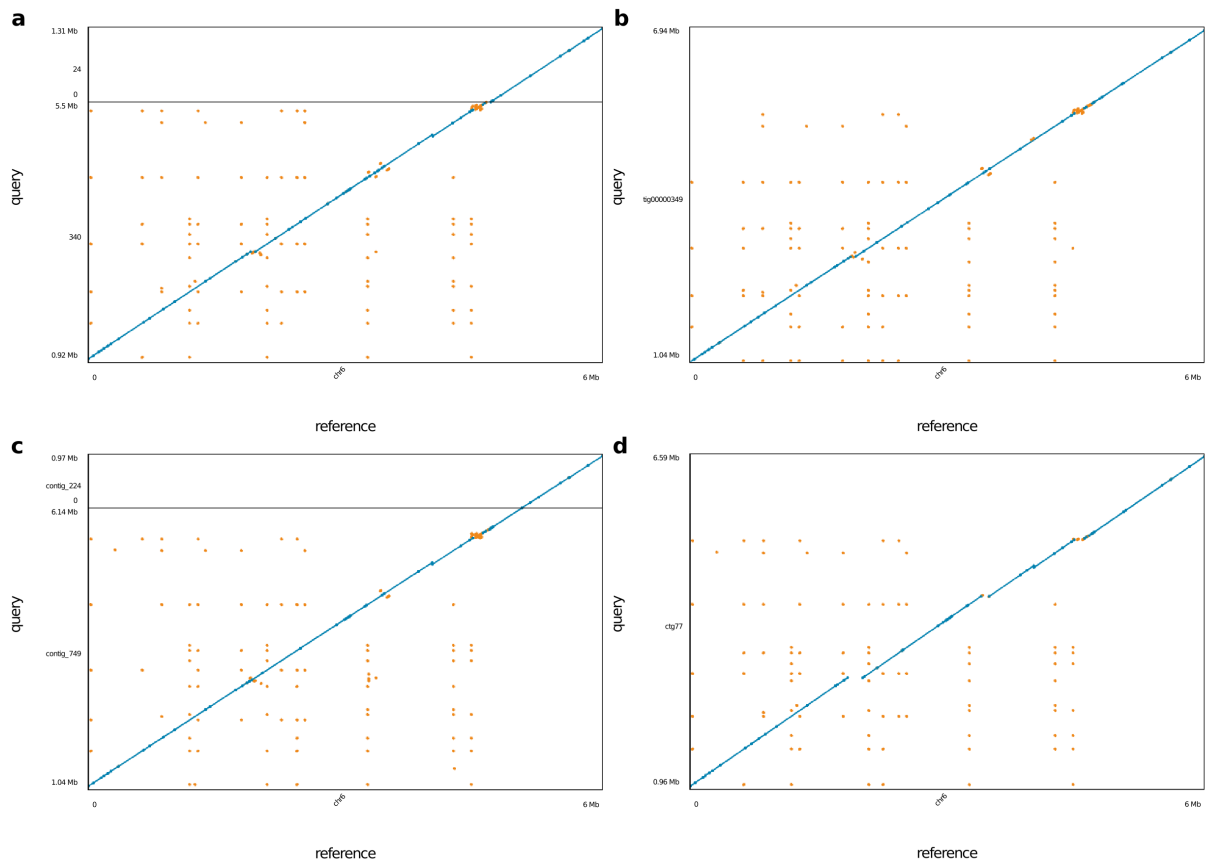

Supplementary Figure 3: Dotplot of unpolished HG00733 diploid MHC assembly vs hg38 chr6:28000000-34000000 for the each of the 4 assemblers tested. (a) Shasta (b) Canu (c) Flye (no native polish) (d) wtdbg2. Blue dots represent unique alignments and orange dots represent repetitive alignments.

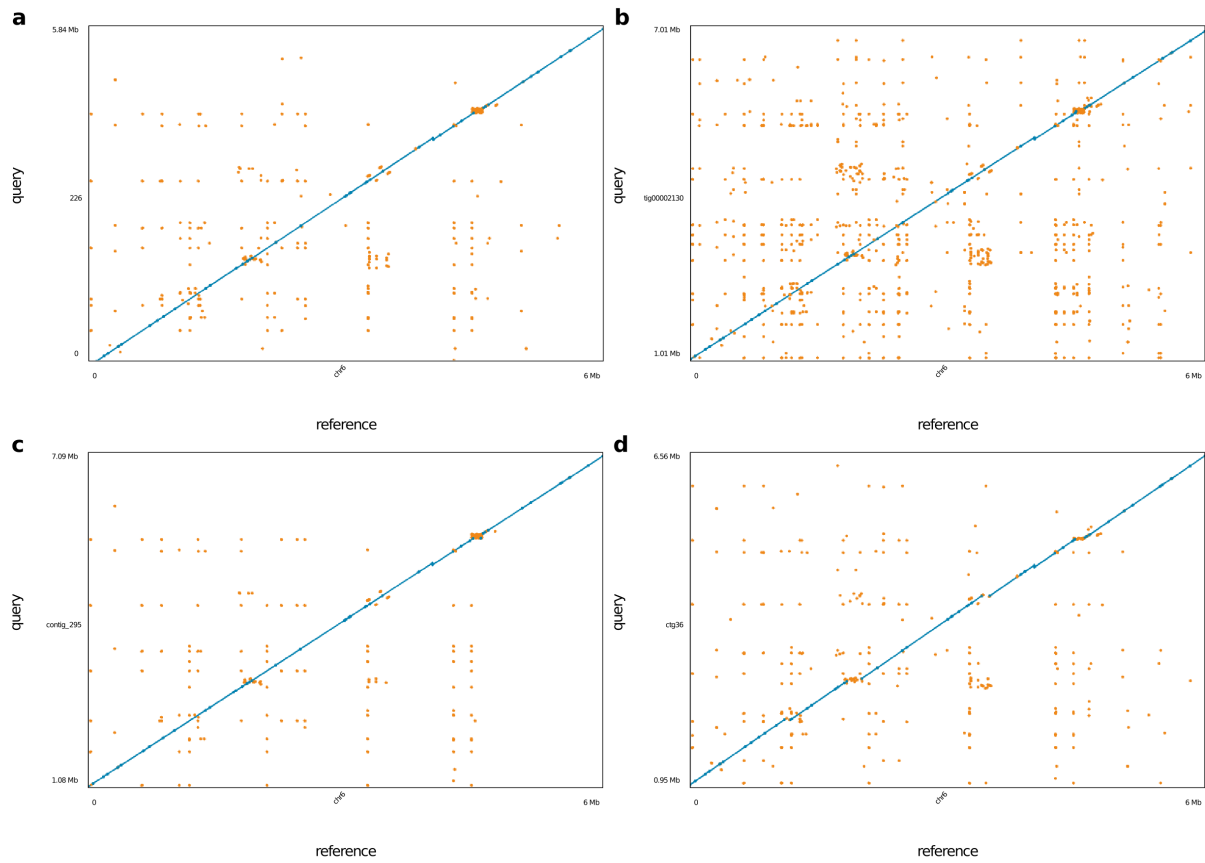

Supplementary Figure 4: Dotplot of unpolished HG00733 maternal haploid MHC assembly vs hg38 chr6:28000000-34000000 for the each of the 4 assemblers tested. **(a)** Shasta **(b)** Canu **(c)** Flye (no native polish) **(d)** wtdbg2. Blue dots represent unique alignments and orange dots represent repetitive alignments.

### Deep neural network based polishing achieves QV30 long-read only polishing accuracy

Supplementary Table 20: Base-level accuracies comparing Racon & Medaka and MarginPolish & HELEN pipelines on Shasta assemblies for three samples. Analysis is performed with whole-genome truth sequences.

| Sample                 | Polisher     |               | Percentage Errors |          |          |           |
|------------------------|--------------|---------------|-------------------|----------|----------|-----------|
|                        | Method       | Model         | Balanced          | Identity | Deletion | Insertion |
| HG002<br>Guppy 2.3.5   | Shasta       | Unpolished    | 0.975%            | 0.061%   | 0.849%   | 0.065%    |
|                        | Racon        | 4x            | 0.665%            | 0.054%   | 0.579%   | 0.032%    |
|                        | Medaka       | r941_flip235  | 0.393%            | 0.051%   | 0.303%   | 0.039%    |
|                        | MarginPolish | guppy_ff235   | 0.372%            | 0.043%   | 0.248%   | 0.081%    |
|                        | HELEN        | r1941_flip235 | 0.279%            | 0.038%   | 0.171%   | 0.070%    |
| HG00733<br>Guppy 2.3.5 | Shasta       | Unpolished    | 1.062%            | 0.083%   | 0.887%   | 0.093%    |
|                        | Racon        | 4x            | 0.715%            | 0.080%   | 0.570%   | 0.066%    |
|                        | Medaka       | r941_flip235  | 0.455%            | 0.075%   | 0.311%   | 0.069%    |
|                        | MarginPolish | guppy_ff235   | 0.460%            | 0.063%   | 0.278%   | 0.118%    |
|                        | HELEN        | r1941_flip235 | 0.388%            | 0.066%   | 0.202%   | 0.120%    |
| CHM13<br>Guppy 2.3.1   | Shasta       | Unpolished    | 0.540%            | 0.039%   | 0.430%   | 0.072%    |
|                        | Racon        | 4x            | 0.367%            | 0.037%   | 0.199%   | 0.131%    |
|                        | Medaka       | r941_flip213  | 0.329%            | 0.033%   | 0.037%   | 0.259%    |
|                        | MarginPolish | guppy_ff233   | 0.281%            | 0.027%   | 0.071%   | 0.184%    |
|                        | HELEN        | r1941_flip233 | 0.206%            | 0.027%   | 0.062%   | 0.117%    |

Supplementary Table 21: QUAST results for the Shasta assemblies for all samples, post polishing with MarginPolish-HELEN.

| Sample  | # contigs | Total length  | N50        | NG50       | # mis-assemblies | Genome fraction (%) | # mismatches per 100 kbp | # indels per 100 kbp | Total aligned length | NA50       | NGA50      |
|---------|-----------|---------------|------------|------------|------------------|---------------------|--------------------------|----------------------|----------------------|------------|------------|
| GM24143 | 2,042     | 2,802,437,249 | 23,531,777 | 19,936,924 | 970              | 95.025              | 128.63                   | 142.77               | 2,794,379,803        | 16,323,510 | 13,840,294 |
| GM24149 | 2,368     | 2,816,566,939 | 20,798,256 | 17,752,973 | 990              | 95.416              | 130.54                   | 134.60               | 2,806,847,428        | 13,174,778 | 12,128,076 |
| GM24385 | 1,685     | 2,819,474,365 | 23,520,830 | 20,346,145 | 960              | 95.609              | 127.44                   | 152.17               | 2,810,951,083        | 16,200,287 | 14,315,298 |
| HG00733 | 1,962     | 2,800,357,697 | 24,600,414 | 21,701,762 | 877              | 94.976              | 126.23                   | 137.92               | 2,792,792,711        | 16,156,822 | 12,971,070 |
| HG01109 | 2,111     | 2,820,988,852 | 21,532,001 | 18,279,481 | 1,033            | 95.564              | 136.51                   | 140.59               | 2,811,696,923        | 13,162,850 | 12,012,786 |
| HG01243 | 1,936     | 2,819,065,027 | 22,753,128 | 20,884,160 | 920              | 95.521              | 137.50                   | 143.02               | 2,810,262,570        | 16,040,951 | 14,115,348 |
| HG02055 | 1,903     | 2,819,836,390 | 17,485,643 | 16,302,857 | 971              | 95.592              | 142.23                   | 162.43               | 2,810,300,557        | 13,840,319 | 12,123,357 |
| HG02080 | 1,814     | 2,803,471,776 | 18,701,305 | 15,584,440 | 920              | 95.045              | 128.16                   | 134.35               | 2,794,749,368        | 12,401,739 | 11,561,569 |
| HG02723 | 1,813     | 2,805,268,038 | 25,163,327 | 20,265,678 | 1,110            | 95.062              | 143.30                   | 147.09               | 2,796,332,696        | 15,390,923 | 13,175,818 |
| HG03098 | 1,790     | 2,811,295,217 | 22,571,315 | 19,620,076 | 986              | 95.395              | 144.36                   | 170.40               | 2,802,844,336        | 14,045,283 | 12,089,849 |
| HG03492 | 1,811     | 2,811,690,127 | 24,629,163 | 22,891,947 | 854              | 95.364              | 126.61                   | 147.22               | 2,804,103,412        | 16,317,390 | 12,930,516 |
| CHM13   | 1,186     | 2,819,245,173 | 46,206,794 | 41,255,275 | 1,107            | 95.281              | 136.58                   | 140.38               | 2,808,536,514        | 23,540,225 | 19,532,176 |



Supplementary Table 22: Base-level accuracies comparing Racon & Medaka and MarginPolish & HELEN pipelines against CHM13 Chromosome-X. The truth Chromosome-X sequence used reflects the most accurate haploid truth sequence available.

| Sample                 | Polisher     |               | Percentage Errors |          |          |           |
|------------------------|--------------|---------------|-------------------|----------|----------|-----------|
|                        | Method       | Model         | Balanced          | Identity | Deletion | Insertion |
| CHM-13<br>Chromosome-X | Shasta       | Unpolished    | 0.469%            | 0.014%   | 0.404%   | 0.051%    |
|                        | Racon        | 4x            | 0.313%            | 0.017%   | 0.192%   | 0.104%    |
|                        | Medaka       | r941_flip213  | 0.110%            | 0.012%   | 0.035%   | 0.063%    |
|                        | MarginPolish | guppy_ff233   | 0.215%            | 0.008%   | 0.055%   | 0.153%    |
|                        | HELEN        | rl941_flip233 | 0.143%            | 0.007%   | 0.041%   | 0.095%    |
|                        |              | rl941_flip231 | 0.064%            | 0.006%   | 0.036%   | 0.022%    |

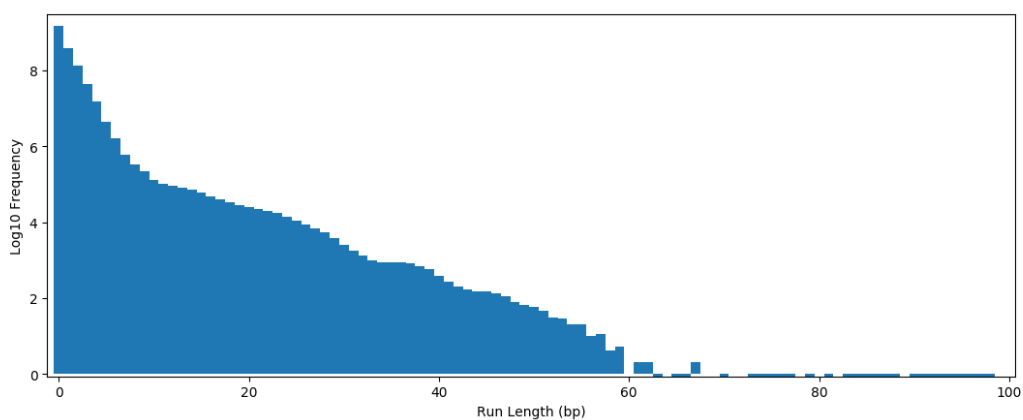

Supplementary Figure 5: Log frequency of each run length as found in the GRCh38 reference for all bases A,C,G,T up to 100bp. Run lengths greater than 15 account for approximately 0.012% of all homopolymer runs in GRCh38.

Supplementary Table 23: Base-level accuracies improvements with MarginPolish and HELEN pipeline on four different assemblers for two samples. Analysis is performed with whole-genome truth sequences.

| Sample                 | Polisher     |               | Percentage Errors |          |          |           |
|------------------------|--------------|---------------|-------------------|----------|----------|-----------|
|                        | Method       | Model         | Balanced          | Identity | Deletion | Insertion |
| HG00733<br>Guppy 2.3.5 | Shasta       | Unpolished    | 1.062%            | 0.083%   | 0.887%   | 0.093%    |
|                        | MarginPolish | guppy_ff235   | 0.460%            | 0.063%   | 0.278%   | 0.118%    |
|                        | HELEN        | rl941_flip235 | 0.388%            | 0.066%   | 0.202%   | 0.120%    |
|                        | Wtdbg2       | Unpolished    | 1.217%            | 0.108%   | 1.059%   | 0.051%    |
|                        | MarginPolish | guppy_ff235   | 0.538%            | 0.083%   | 0.333%   | 0.122%    |
|                        | HELEN        | rl941_flip235 | 0.473%            | 0.089%   | 0.257%   | 0.127%    |
|                        | Canu         | Unpolished    | 1.328%            | 0.074%   | 1.224%   | 0.031%    |
|                        | MarginPolish | guppy_ff235   | 0.438%            | 0.050%   | 0.290%   | 0.098%    |
|                        | HELEN        | rl941_flip235 | 0.355%            | 0.050%   | 0.206%   | 0.099%    |
|                        | Flye         | Unpolished    | 1.854%            | 0.089%   | 0.445%   | 1.320%    |
|                        | MarginPolish | guppy_ff235   | 0.425%            | 0.062%   | 0.257%   | 0.106%    |
|                        | HELEN        | rl941_flip235 | 0.356%            | 0.064%   | 0.183%   | 0.109%    |
| CHM13<br>Guppy 2.3.1   | Shasta       | Unpolished    | 0.540%            | 0.039%   | 0.430%   | 0.072%    |
|                        | MarginPolish | guppy_ff233   | 0.281%            | 0.027%   | 0.071%   | 0.184%    |
|                        | HELEN        | rl941_flip233 | 0.206%            | 0.027%   | 0.062%   | 0.117%    |
|                        | Wtdbg2       | Unpolished    | 0.689%            | 0.068%   | 0.583%   | 0.038%    |
|                        | MarginPolish | guppy_ff233   | 0.361%            | 0.049%   | 0.112%   | 0.201%    |
|                        | HELEN        | rl941_flip233 | 0.296%            | 0.053%   | 0.115%   | 0.129%    |
|                        | Canu         | Unpolished    | 0.705%            | 0.038%   | 0.643%   | 0.024%    |
|                        | MarginPolish | guppy_ff233   | 0.255%            | 0.013%   | 0.075%   | 0.168%    |
|                        | HELEN        | rl941_flip233 | 0.173%            | 0.012%   | 0.058%   | 0.103%    |
|                        | Flye         | Unpolished    | 2.213%            | 0.051%   | 0.448%   | 1.715%    |
|                        | MarginPolish | guppy_ff233   | 0.256%            | 0.022%   | 0.058%   | 0.176%    |
|                        | HELEN        | rl941_flip233 | 0.185%            | 0.024%   | 0.052%   | 0.109%    |

Supplementary Table 24: Single-chromosome error rates after polishing with short reads. 10X Chromium reads for sample CHM13 were used to polish via Pilon polishing software. The top half of the table shows the results of three rounds of Pilon, starting from the CHM13 Shasta chrX assembly that had been polished with MarginPolish and HELEN. The bottom half shows the results of three rounds of Pilon, starting from the raw Shasta assembly.

| Sample        | Assembly          | Percentage Errors |          |          |           | Q Scores |          |          |           |
|---------------|-------------------|-------------------|----------|----------|-----------|----------|----------|----------|-----------|
|               |                   | Balanced          | Identity | Deletion | Insertion | Balanced | Identity | Deletion | Insertion |
| CHM13<br>ChrX | Shasta (polished) | 0.064%            | 0.006%   | 0.036%   | 0.022%    | 31.92    | 42.40    | 34.42    | 36.51     |
|               | Pilon 1x          | 0.025%            | 0.004%   | 0.012%   | 0.008%    | 36.06    | 43.75    | 39.16    | 40.75     |
|               | Pilon 2x          | 0.023%            | 0.004%   | 0.012%   | 0.007%    | 36.29    | 43.51    | 39.32    | 41.34     |
| CHM13<br>ChrX | Shasta (raw)      | 0.468%            | 0.014%   | 0.404%   | 0.051%    | 23.29    | 38.57    | 23.94    | 32.95     |
|               | Pilon 1x          | 0.449%            | 0.011%   | 0.395%   | 0.043%    | 23.48    | 39.78    | 24.03    | 33.68     |
|               | Pilon 2x          | 0.425%            | 0.011%   | 0.373%   | 0.041%    | 23.71    | 39.49    | 24.29    | 33.84     |

Supplementary Table 25: Runtime and cost of two polishing workflows on Amazon Web Services (AWS) platform.

| Method                | Sample  | Minutes | Threads Used | Peak Memory | Instance Type | Instance Cost |
|-----------------------|---------|---------|--------------|-------------|---------------|---------------|
| Racon (4x)            | HG00733 | 3099    | 62           | 574         | r5a.24xlarge  | \$5.42        |
|                       | GM24385 | 2342    | 62           | 501         | r5a.24xlarge  | \$5.42        |
|                       | CHM13   | 3700    | 62           | 281         | r5a.24xlarge  | \$5.42        |
| Medaka mini_align     | HG00733 | 611     | 62           | 101         | c5.18xlarge   | \$3.06        |
|                       | GM24385 | 489     | 62           | 115         | c5.18xlarge   | \$3.06        |
|                       | CHM13   | 810     | 60           | 143         | c5.18xlarge   | \$3.06        |
| Medaka call_consensus | HG00733 | 8611    | 62           | 164         | c5n.18xlarge  | \$3.89        |
|                       | GM24385 | 3355    | 62           | 150         | c5n.18xlarge  | \$3.89        |
|                       | CHM13   | 2532    | 62           | 149         | c5n.18xlarge  | \$3.89        |
| MarginPolish          | HG00733 | 680     | 90           | 66          | m5.metal      | \$4.61        |
|                       | HG01109 | 912     | 70           | 57          | c5.18xlarge   | \$3.06        |
|                       | HG01243 | 835     | 70           | 65          | c5.18xlarge   | \$3.06        |
|                       | HG02055 | 733     | 70           | 77          | c5.18xlarge   | \$3.06        |
|                       | HG02080 | 793     | 70           | 64          | c5.18xlarge   | \$3.06        |
|                       | HG02723 | 1000    | 64           | 60          | c5.18xlarge   | \$3.06        |
|                       | HG03098 | 852     | 70           | 78          | c5.18xlarge   | \$3.06        |
|                       | HG03492 | 777     | 70           | 80          | c5.18xlarge   | \$3.06        |
|                       | GM24385 | 842     | 70           | 66          | c5.18xlarge   | \$3.06        |
|                       | GM24149 | 1037    | 64           | 103         | c5.18xlarge   | \$3.06        |
|                       | GM24143 | 1051    | 64           | 84          | c5.18xlarge   | \$3.06        |
|                       | CHM13   | 739     | 70           | 65          | c5.18xlarge   | \$3.06        |
| HELEN consensus       | HG00733 | 216     | 8 GPUs       | -           | p2.8xlarge    | \$7.20        |
|                       | HG01109 | 204     | 8 GPUs       | -           | p2.8xlarge    | \$7.20        |
|                       | HG01243 | 233     | 8 GPUs       | -           | p2.8xlarge    | \$7.20        |
|                       | HG02080 | 212     | 8 GPUs       | -           | p2.8xlarge    | \$7.20        |
|                       | HG03098 | 216     | 8 GPUs       | -           | p2.8xlarge    | \$7.20        |
|                       | GM24385 | 208     | 8 GPUs       | -           | p2.8xlarge    | \$7.20        |
|                       | GM24143 | 226     | 8 GPUs       | -           | p2.8xlarge    | \$7.20        |
| HELEN stitch          | HG00733 | 59      | 32           | -           | p2.8xlarge    | \$7.20        |
|                       | HG01109 | 50      | 32           | -           | p2.8xlarge    | \$7.20        |
|                       | HG01243 | 49      | 32           | -           | p2.8xlarge    | \$7.20        |
|                       | HG02080 | 54      | 32           | -           | p2.8xlarge    | \$7.20        |
|                       | HG03098 | 65      | 32           | -           | p2.8xlarge    | \$7.20        |
|                       | GM24385 | 68      | 32           | -           | p2.8xlarge    | \$7.20        |
|                       | GM24143 | 62      | 32           | -           | p2.8xlarge    | \$7.20        |

Supplementary Table 26: Runtime and cost of two polishing workflows run on a 29 Mb contig from the HG00733 Shasta assembly. MarginPolish uses an improved stitch method not used in original runs and Racon was run once instead of four times as was done in the full runs. All runs were configured to use 32 CPUs, except for the GPU runs which were performed with 16 CPUs and 1 GPU (Tesla P100).

| <b>Application</b>        | <b>Runtimes</b> | <b>Avg Runtime</b> |
|---------------------------|-----------------|--------------------|
| MarginPolish              | 16.6            | 16.46              |
|                           | 16.47           |                    |
|                           | 16.31           |                    |
| HELEN consensus<br>(CPU)  | 97.46           | 95.86              |
|                           | 95.55           |                    |
|                           | 94.56           |                    |
| HELEN consensus<br>(GPU)  | 1.63            | 1.67               |
|                           | 1.72            |                    |
|                           | 1.65            |                    |
| HELEN stitch              | 0.76            | 0.78               |
|                           | 0.78            |                    |
|                           | 0.80            |                    |
| Racon 1x                  | 52.00           | 52.04              |
|                           | 52.15           |                    |
|                           | 51.98           |                    |
| mini_align                | 3.01            | 3.00               |
|                           | 3.00            |                    |
|                           | 2.98            |                    |
| Medaka<br>(CPU)           | 17.26           | 17.01              |
|                           | 16.78           |                    |
|                           | 16.98           |                    |
| Medaka consensus<br>(GPU) | 10.55           | 10.62              |
|                           | 10.73           |                    |
|                           | 10.57           |                    |
| Medaka stitch<br>(GPU)    | 0.68            | 0.68               |
|                           | 0.68            |                    |
|                           | 0.68            |                    |

**Long-read assemblies contain nearly all human coding genes**

Supplementary Table 27: Transcript-level analysis with Comparative Annotation Toolkit (CAT) of Margin-Polish & HELEN and Racon & Medaka on three samples from Shasta assemblies.

| Metric                                                                     |         | HG002  |        | HG00733 |        | CHM13  |        |
|----------------------------------------------------------------------------|---------|--------|--------|---------|--------|--------|--------|
|                                                                            |         | HELEN  | MEDAKA | HELEN   | MEDAKA | HELEN  | MEDAKA |
| Transcripts Found                                                          | Total   | 83093  | 83105  | 83002   | 82928  | 82833  | 82807  |
|                                                                            | Percent | 99.536 | 99.551 | 99.427  | 99.339 | 99.225 | 99.194 |
| Full mRNA Coverage                                                         | Total   | 25721  | 20367  | 28612   | 26573  | 40132  | 38081  |
|                                                                            | Percent | 30.811 | 24.397 | 34.274  | 31.832 | 48.074 | 45.617 |
| Full CDS Coverage                                                          | Total   | 41396  | 36248  | 45104   | 43956  | 53089  | 52297  |
|                                                                            | Percent | 49.588 | 43.421 | 54.030  | 52.655 | 63.595 | 62.646 |
| Transcripts With Frameshift                                                | Total   | 35339  | 40783  | 31333   | 32647  | 23261  | 24441  |
|                                                                            | Percent | 42.332 | 48.854 | 37.534  | 39.108 | 27.864 | 29.278 |
| Transcripts With Original Introns                                          | Total   | 76880  | 76883  | 76618   | 76463  | 76807  | 76803  |
|                                                                            | Percent | 92.094 | 92.098 | 91.780  | 91.594 | 92.006 | 92.002 |
| Transcripts With Full CDS Coverage                                         | Total   | 41396  | 36248  | 45104   | 43956  | 53089  | 52297  |
|                                                                            | Percent | 49.588 | 43.421 | 54.030  | 52.655 | 63.595 | 62.646 |
| Transcripts With Full CDS Coverage And No Frameshifts                      | Total   | 41245  | 36158  | 44982   | 43860  | 52966  | 52160  |
|                                                                            | Percent | 49.407 | 43.313 | 53.884  | 52.540 | 63.448 | 62.482 |
| Transcripts With Full CDS Coverage And No Frameshifts And Original Introns | Total   | 41021  | 35952  | 44692   | 43546  | 52616  | 51807  |
|                                                                            | Percent | 49.139 | 43.067 | 53.536  | 52.163 | 63.028 | 62.059 |

Supplementary Table 28: Gene-level analysis with Comparative Annotation Toolkit (CAT) of MarginPolish &amp; HELEN and Racon &amp; Medaka on three samples from Shasta assemblies.

| Metric                                                               |         | HG002  |        | HG00733 |        | CHM13  |        |
|----------------------------------------------------------------------|---------|--------|--------|---------|--------|--------|--------|
|                                                                      |         | HELEN  | MEDAKA | HELEN   | MEDAKA | HELEN  | MEDAKA |
| Genes Found                                                          | Total   | 19536  | 19531  | 19537   | 19511  | 19505  | 19490  |
|                                                                      | Percent | 99.268 | 99.243 | 99.273  | 99.141 | 99.111 | 99.035 |
| Genes With Frameshift                                                | Total   | 10933  | 12165  | 9941    | 10081  | 7300   | 7564   |
|                                                                      | Percent | 55.554 | 61.814 | 50.513  | 51.225 | 37.093 | 38.435 |
| Genes With Original Introns                                          | Total   | 18212  | 18198  | 18151   | 18113  | 18217  | 18202  |
|                                                                      | Percent | 92.541 | 92.47  | 92.231  | 92.038 | 92.566 | 92.49  |
| Genes With Full CDS Coverage                                         | Total   | 11070  | 10066  | 11812   | 11756  | 13648  | 13534  |
|                                                                      | Percent | 56.25  | 51.148 | 60.02   | 59.736 | 69.35  | 68.77  |
| Genes With Full CDS Coverage And No Frameshifts                      | Total   | 12454  | 11570  | 13127   | 13081  | 14625  | 14562  |
|                                                                      | Percent | 63.283 | 58.791 | 66.702  | 66.468 | 74.314 | 73.994 |
| Genes With Full CDS Coverage And No Frameshifts And Original Introns | Total   | 12422  | 11539  | 13098   | 13042  | 14603  | 14531  |
|                                                                      | Percent | 63.12  | 58.633 | 66.555  | 66.27  | 74.202 | 73.836 |
| Missing Genes                                                        | Total   | 144    | 149    | 143     | 169    | 175    | 190    |
|                                                                      | Percent | 0.732  | 0.757  | 0.727   | 0.859  | 0.889  | 0.965  |

Supplementary Table 29: Transcript-level analysis with Comparative Annotation Toolkit (CAT) of four HG00733 assemblies polished with MarginPolish and HELEN.

| Metric                                                                              |         | HG00733       |               |                 |                 |
|-------------------------------------------------------------------------------------|---------|---------------|---------------|-----------------|-----------------|
|                                                                                     |         | Flye<br>HELEN | Canu<br>HELEN | Wtdbg2<br>HELEN | Shasta<br>HELEN |
| Transcripts Found                                                                   | Total   | 83267         | 83334         | 81484           | 82974           |
|                                                                                     | Percent | 99.745        | 99.825        | 97.609          | 99.394          |
| Full mRNA Coverage                                                                  | Total   | 33078         | 28488         | 28889           | 30378           |
|                                                                                     | Percent | 39.624        | 34.126        | 34.606          | 36.390          |
| Full CDS Coverage                                                                   | Total   | 41396         | 44877         | 45321           | 46965           |
|                                                                                     | Percent | 59.754        | 53.758        | 54.290          | 56.259          |
| Transcripts With<br>Frameshift                                                      | Total   | 27293         | 32230         | 29525           | 29657           |
|                                                                                     | Percent | 32.694        | 38.608        | 35.368          | 35.526          |
| Transcripts With<br>Original Introns                                                | Total   | 77412         | 77583         | 74683           | 76613           |
|                                                                                     | Percent | 92.731        | 92.936        | 89.462          | 91.774          |
| Transcripts with<br>Full CDS Coverage                                               | Total   | 49883         | 44877         | 45321           | 46965           |
|                                                                                     | Percent | 59.754        | 53.758        | 54.290          | 56.259          |
| Transcripts with<br>Full CDS Coverage<br>And No Frameshifts                         | Total   | 49766         | 44737         | 45217           | 46802           |
|                                                                                     | Percent | 59.614        | 53.590        | 54.165          | 56.064          |
| Transcripts with<br>Full CDS Coverage<br>And No Frameshifts<br>And Original Introns | Total   | 49459         | 44412         | 44924           | 46505           |
|                                                                                     | Percent | 59.247        | 53.201        | 53.814          | 55.708          |



Supplementary Table 30: Gene-level analysis with Comparative Annotation Toolkit (CAT) of four HG00733 assemblies polished with MarginPolish and HELEN

| Metric                                                                        |         | HG00733       |               |                 |                 |
|-------------------------------------------------------------------------------|---------|---------------|---------------|-----------------|-----------------|
|                                                                               |         | Flye<br>HELEN | Canu<br>HELEN | Wtdbg2<br>HELEN | Shasta<br>HELEN |
| Genes Found                                                                   | Total   | 19563         | 19629         | 19174           | 19528           |
|                                                                               | Percent | 99.405        | 99.741        | 97.429          | 99.228          |
| Genes With<br>Frameshift                                                      | Total   | 8698          | 10160         | 9323            | 9464            |
|                                                                               | Percent | 44.197        | 51.626        | 47.373          | 48.089          |
| Genes With<br>Original Introns                                                | Total   | 18345         | 18460         | 17709           | 18154           |
|                                                                               | Percent | 93.216        | 93.801        | 89.985          | 92.246          |
| Genes With<br>Full CDS Coverage                                               | Total   | 12966         | 11889         | 11817           | 12207           |
|                                                                               | Percent | 65.884        | 60.412        | 60.046          | 62.027          |
| Genes With<br>Full CDS Coverage<br>And No Frameshifts                         | Total   | 14145         | 13221         | 13047           | 13419           |
|                                                                               | Percent | 71.875        | 67.18         | 66.296          | 68.186          |
| Genes With<br>Full CDS Coverage<br>And No Frameshifts<br>And Original Introns | Total   | 14124         | 13193         | 13017           | 13396           |
|                                                                               | Percent | 71.768        | 67.038        | 66.143          | 68.069          |
| Missing Genes                                                                 | Total   | 117           | 51            | 506             | 152             |
|                                                                               | Percent | 0.595         | 0.259         | 2.571           | 0.772           |

Supplementary Table 31: BUSCO results of three samples using two polishing workflows on Shasta assemblies.

| Sample  | Metric                              | Shasta<br>MarginPolish<br>HELEN | Shasta<br>Racon (4x)<br>Medaka |
|---------|-------------------------------------|---------------------------------|--------------------------------|
| HG00733 | Complete BUSCOs (C)                 | 87.20%                          | 87.10%                         |
|         | Complete and single-copy BUSCOs (S) | 84.20%                          | 83.80%                         |
|         | Complete and duplicated BUSCOs (D)  | 3.00%                           | 3.30%                          |
|         | Fragmented BUSCOs (F)               | 4.60%                           | 5.30%                          |
|         | Missing BUSCOs (M)                  | 8.20%                           | 7.60%                          |
| HG002   | Complete BUSCOs (C)                 | 89.40%                          | 88.80%                         |
|         | Complete and single-copy BUSCOs (S) | 84.80%                          | 85.80%                         |
|         | Complete and duplicated BUSCOs (D)  | 4.60%                           | 3.00%                          |
|         | Fragmented BUSCOs (F)               | 3.60%                           | 4.30%                          |
|         | Missing BUSCOs (M)                  | 7.00%                           | 6.90%                          |
| CHM13   | Complete BUSCOs (C)                 | 86.50%                          | 86.80%                         |
|         | Complete and single-copy BUSCOs (S) | 82.50%                          | 82.80%                         |
|         | Complete and duplicated BUSCOs (D)  | 4.00%                           | 4.00%                          |
|         | Fragmented BUSCOs (F)               | 5.90%                           | 5.30%                          |
|         | Missing BUSCOs (M)                  | 7.60%                           | 7.90%                          |

Supplementary Table 32: BUSCO results for four assemblers on HG00733, post polishing with MarginPolish and HELEN.

| Metric                              | HG00733 |        |        |        |
|-------------------------------------|---------|--------|--------|--------|
|                                     | Flye    | Canu   | Wtdbg2 | Shasta |
| Complete BUSCOs (C)                 | 87.50%  | 89.80% | 85.80% | 87.20% |
| Complete and single-copy BUSCOs (S) | 84.50%  | 86.80% | 82.20% | 84.20% |
| Complete and duplicated BUSCOs (D)  | 3.00%   | 3.00%  | 3.60%  | 3.00%  |
| Fragmented BUSCOs (F)               | 5.30%   | 3.00%  | 6.30%  | 4.60%  |
| Missing BUSCOs (M)                  | 7.20%   | 7.20%  | 7.90%  | 8.20%  |

## Comparing to a PacBio HiFi Assembly

Supplementary Table 33: CHM13 QUASt results for Shasta, MarginPolish, HELEN and PacBio HiFi assembly. Stratified disagreement counts were added after manual determination.

| Metric                                           | CHM13                                     |                              |
|--------------------------------------------------|-------------------------------------------|------------------------------|
|                                                  | Nanopore<br>Shasta<br>MarginPolish, HELEN | PacBio-HiFi<br>Canu<br>Racon |
| # contigs                                        | 1622                                      | 5206                         |
| Total length                                     | 2819245173                                | 3031026325                   |
| N50                                              | 46206794                                  | 29522819                     |
| NG50                                             | 41255275                                  | 29092230                     |
| # disagreements                                  | 1107                                      | 8666                         |
| # disagreements outside Centromeres              | 801                                       | 2999                         |
| # disagreements outside centromeres and Seg Dups | 314                                       | 893                          |
| Genome fraction (%)                              | 95.281                                    | 97.030                       |
| # mismatches per 100 kbp                         | 136.58                                    | 274.84                       |
| # indels per 100 kbp                             | 140.38                                    | 32.99                        |
| Total aligned length                             | 2808536514                                | 2954558720                   |
| NA50                                             | 23540225                                  | 20440378                     |
| NGA50                                            | 19532176                                  | 20029136                     |

Supplementary Table 34: Disagreement count in the intersection of the assemblies between the PacBio-HiFi and the Shasta assembly of CHM13. Total Disagreements is all disagreements found in 100bp before windows before taking the intersection, note it is very close to that reported by QUASt. Consensus disagreements: Disagreements in the intersection of the four assemblies.

| Sample | Assembler   | Total disagreements | Consensus disagreements |
|--------|-------------|---------------------|-------------------------|
| CHM13  | PacBio-HiFi | 8469                | 594                     |
|        | Shasta      | 1073                | 380                     |

Supplementary Table 35: CHM13 Chromosome-X error rate analysis with Pomoxis for Shasta, MarginPolish, HELEN, and PacBio HiFi assembly.

| Sample      | Sequencing Platform | Method    |                      | Percentage errors |          |          |           |
|-------------|---------------------|-----------|----------------------|-------------------|----------|----------|-----------|
|             |                     | Assembler | Polisher             | Balanced          | Identity | Deletion | Insertion |
| CHM13 Chr-X | PacBio HiFi         | Canu      | Racon                | 0.008%            | 0.001%   | 0.004%   | 0.003%    |
|             | Nanopore            | Shasta    | MarginPolish & HELEN | 0.064%            | 0.006%   | 0.036%   | 0.022%    |

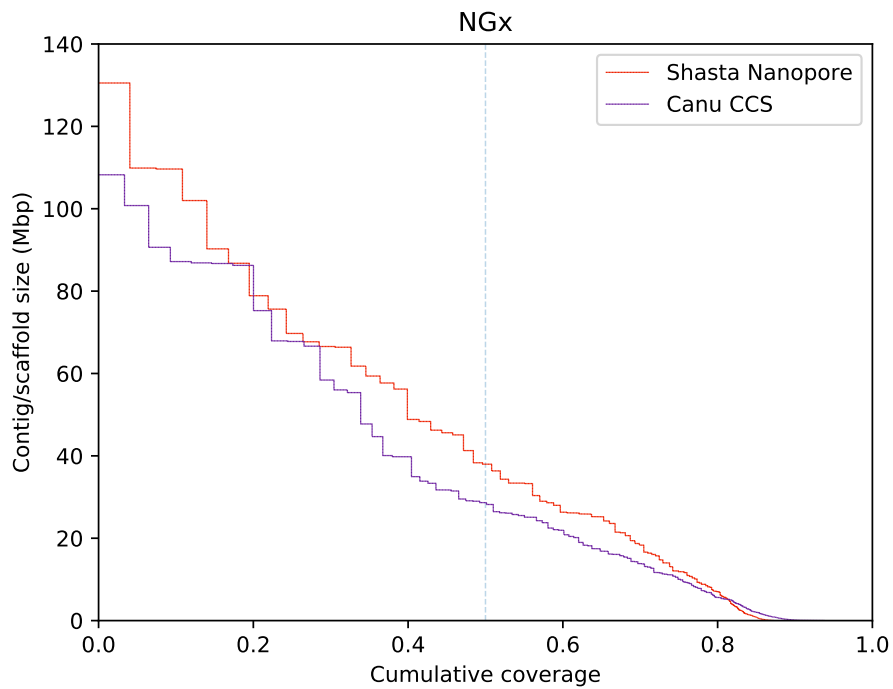

Supplementary Figure 6: Contig NGx for CHM13 Shasta-HELEN nanopore assembly vs Canu CCS (HiFi) assembly

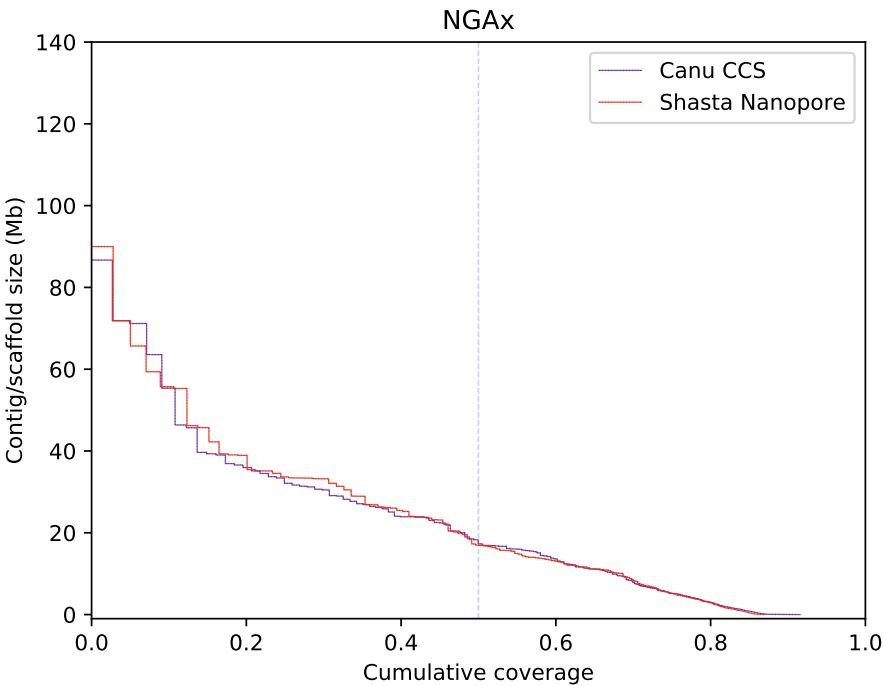

Supplementary Figure 7: Contig NGAx for CHM13 Shasta-HELEN nanopore assembly vs Canu CCS (HiFi) assembly

Assembling, polishing and scaffolding 11 human genomes at near chromosome scale

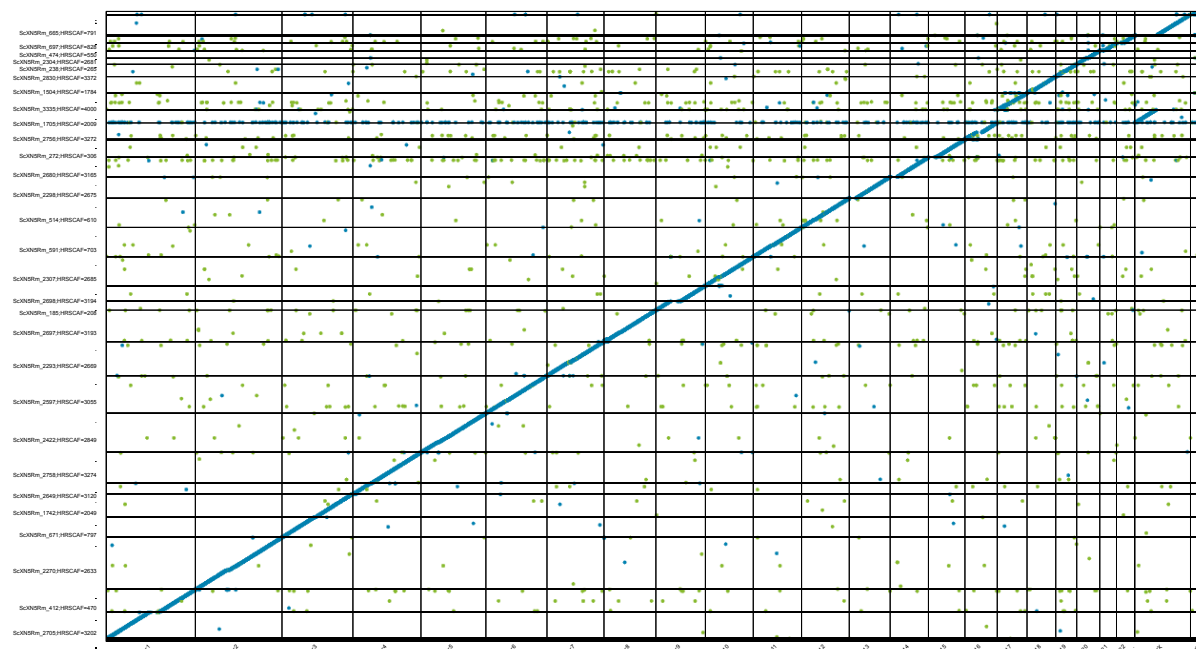

Supplementary Figure 8: Dotplot for the scaffolded HG002 assembly, aligned with GRCh38. Blue dots represent unique alignments and orange dots represent repetitive alignments.

Supplementary Table 36: QUASt results for all 11 Shasta assemblies scaffolded with HiRise, post polishing with MarginPolish-HELEN

| Sample  | # contigs | Total length  | N50         | NG50        | # mis-assemblies | # scaffold gap extensive mis-assemblies | Genome fraction (%) | # mismatches per 100 kbp | # indels per 100 kbp | Total aligned length | NA50       | NGA50      |
|---------|-----------|---------------|-------------|-------------|------------------|-----------------------------------------|---------------------|--------------------------|----------------------|----------------------|------------|------------|
| GM24143 | 1,184     | 2,802,523,049 | 129,960,437 | 128,216,303 | 1,466            | 4                                       | 95.027              | 128.28                   | 142.79               | 2,792,775,664        | 20,657,530 | 16,966,477 |
| GM24149 | 1,323     | 2,816,683,224 | 129,643,816 | 128,275,807 | 1,530            | 11                                      | 95.417              | 130.24                   | 134.58               | 2,804,735,382        | 18,446,390 | 15,435,923 |
| GM24385 | 1,019     | 2,819,527,260 | 118,169,209 | 102,591,941 | 1,335            | 6                                       | 95.606              | 127.19                   | 152.25               | 2,809,570,528        | 22,369,161 | 16,601,924 |
| HG00733 | 1,056     | 2,800,455,909 | 129,857,865 | 118,785,172 | 1,337            | 8                                       | 94.974              | 126.16                   | 138.09               | 2,791,610,554        | 22,141,375 | 17,570,210 |
| HG01109 | 1,156     | 2,821,098,626 | 130,282,751 | 130,166,418 | 1,529            | 5                                       | 95.559              | 136.73                   | 140.63               | 2,809,413,640        | 19,932,703 | 17,228,023 |
| HG01243 | 1,006     | 2,819,162,443 | 128,571,344 | 118,762,399 | 1,381            | 7                                       | 95.517              | 137.47                   | 143.03               | 2,808,041,766        | 22,146,722 | 17,559,055 |
| HG02055 | 977       | 2,819,933,140 | 130,184,428 | 128,180,737 | 1,387            | 8                                       | 95.587              | 141.91                   | 162.46               | 2,809,195,864        | 21,057,279 | 18,446,049 |
| HG02080 | 934       | 2,803,570,658 | 129,931,575 | 128,451,196 | 1,470            | 9                                       | 95.041              | 127.98                   | 134.36               | 2,793,854,132        | 20,418,609 | 16,379,851 |
| HG02723 | 982       | 2,805,356,030 | 130,365,062 | 128,975,828 | 1,499            | 9                                       | 95.06               | 143.45                   | 147.13               | 2,794,747,200        | 20,232,566 | 17,865,825 |
| HG03098 | 926       | 2,811,385,538 | 130,040,472 | 128,535,908 | 1,439            | 4                                       | 95.391              | 144.36                   | 170.40               | 2,801,774,564        | 22,165,948 | 17,439,948 |
| HG03492 | 901       | 2,811,782,250 | 130,277,907 | 100,251,163 | 1,381            | 7                                       | 95.362              | 126.54                   | 147.23               | 2,803,106,787        | 20,001,587 | 16,836,756 |
